# Supplementary material for: Sex-specific epigenetic signatures of circulating urate and its increase after BCG vaccination
Source: Research Square preprint supplement (doi:10.21203/rs.3.rs-4498597/v1), 2024-07-22
Supplement: Supplementary file 1 [file df84331c04687100113b3f1f.xlsx]

## Sheet: Overview of the S Table
Table S1	Basic information of the study cohort
Table S2	Baseline urate-associated CpG in males that reached epigenome-wide significance with FDR adjusted P below 0.05
Table S3	Baseline urate-associated CpG in females that reached epigenome-wide significance with FDR adjusted P below 0.05
Table S4	eQTM of the urate-associated CpG sites identified in males
Table S5	Urate-associated CpG sites (from males) in discovery cohort and replication cohorts
Table S6	Enrichment of urate change-associated CpG from females
Table S7	Enrichment of urate change-associated CpG from males
Table S8	X-chromosomal-wide association of urate or urate change

## Sheet: Table S1
Table S1: Basic information of the study cohort (discovery cohort)
	BCG cohort
	Males	Females	P
Age/years(mean±sd)	27 ± 12	25 ± 9	0.098
BMI (kg/m2) (mean±sd)	22.77 ± 2.66	22.29 ± 2.42	0.12
Smoking status (never/past-smoker/smoker)	91/17/15	143/13/2	0.00012
a t-test was used to determine the significance difference between males and females for age and BMI.
a chi-square test of independence was conducted to calculate the significance of difference between males and females for smoking status.
The samples after QC (mentioned in Figure S1) were included in this analysis

## Sheet: Table S2
Table S2: Baseline urate-associated CpG in males that reached epigenome-wide significance with FDR adjusted P below 0.05
probeID	BETA	SE	P_VAL	padj	chr_hg19	pos_hg19	UCSC_RefGene_Name	Relation_to_Island	Gene (distance to TSS) (great annotation tool)
cg17828057	-3.88858	0.629123	6.37157e-10	0.000476665	chr8	42037527	PLAT;PLAT	OpenSea	AP3M2 (+27064), PLAT (+27714)
cg10115985	-2.0443	0.346477	3.62942e-09	0.00104153	chr19	42416162		N_Shore	ARHGEF1 (+27648), RABAC1 (+47379)
cg08601457	2.07968	0.353864	4.17665e-09	0.00104153	chr6	112115117	FYN	OpenSea	TRAF3IP2 (-187669), FYN (+79537)
cg14914220	2.85683	0.491545	6.17538e-09	0.00115497	chr19	30897573	ZNF536	OpenSea	ZNF536 (+34255), TSHZ3 (+942879)
cg04233669	2.58572	0.451326	1.00936e-08	0.00151023	chr5	135173201	LOC153328	S_Shelf	SLC25A48 (+2786), IL9 (+58314)
cg15994304	4.27433	0.759253	1.80577e-08	0.00225153	chr19	55304568		OpenSea	KIR2DL4 (-10526), KIR2DL1 (+23306)
cg20005968	1.58385	0.284261	2.52111e-08	0.00269439	chr20	59561730		OpenSea	CDH4 (-265751)
cg00795900	-3.40492	0.619708	3.92046e-08	0.00366618	chr16	2392201	ABCA17P;ABCA3	S_Shore	ABCA3 (-1466)
cg18400281	1.97463	0.361129	4.55298e-08	0.0037846	chr10	24633303	KIAA1217;KIAA1217;KIAA1217	OpenSea	KIAA1217 (+135211), ARHGAP21 (+379293)
cg02371824	-2.21373	0.40855	6.00995e-08	0.00428397	chr6	109761110	SMPD2;PPIL6;PPIL6;PPIL6;PPIL6;PPIL6	N_Shore	SMPD2 (-855)
cg21003249	1.095	0.20284	6.72563e-08	0.00428397	chr1	32931036	ZBTB8B	Island	ZBTB8B (+367)
cg07388700	-1.28315	0.238001	6.99231e-08	0.00428397	chr1	10020901	NMNAT1	OpenSea	RBP7 (-36372), NMNAT1 (+17416)
cg14569988	1.96485	0.365959	7.91532e-08	0.00428397	chr15	40231845	EIF2AK4	OpenSea	EIF2AK4 (+5492), SRP14 (+99543)
cg17326451	1.89558	0.353208	8.01693e-08	0.00428397	chr7	86975534	CROT;TP53TG1;CROT;CROT	S_Shore	CROT (+538)
cg15172529	7.51322	1.4045	8.8241e-08	0.00434848	chr6	116783000	FAM26F	N_Shore	FAM26F (+445)
cg00528779	2.9358	0.549787	9.30016e-08	0.00434848	chr12	124926062	NCOR2;NCOR2	N_Shelf	NCOR2 (+53735), FAM101A (+152353)
cg18400331	2.30828	0.434401	1.07412e-07	0.00472683	chr2	75860973		OpenSea	EVA1A (-64126), MRPL19 (-12935)
cg20348932	0.923797	0.174655	1.22812e-07	0.00510428	chr4	54367958	LNX1-AS1;LNX1;LNX1	OpenSea	LNX1 (+89824), FIP1L1 (+124147)
cg26731327	-2.47849	0.470851	1.41071e-07	0.00519131	chr8	143591819	BAI1	Island	BAI1 (+61029), ARC (+105013)
cg00402381	-2.23957	0.425713	1.43458e-07	0.00519131	chr19	42416271		N_Shore	ARHGEF1 (+27757), RABAC1 (+47270)
cg09263024	-1.34994	0.257033	1.50446e-07	0.00519131	chr10	133950036	JAKMIP3	N_Shore	DPYSL4 (-50367), JAKMIP3 (+31862)
cg10400227	2.07861	0.396066	1.53632e-07	0.00519131	chr13	110960772	COL4A1;COL4A1;COL4A2	S_Shore	COL4A1 (-1277), COL4A2 (+1159)
cg18932116	-2.11321	0.403199	1.59602e-07	0.00519131	chr19	15121527	CCDC105;SLC1A6	N_Shore	CCDC105 (-28)
cg24604013	1.63822	0.314142	1.83931e-07	0.00573338	chr13	112721325	SOX1	Island	SOX1 (-587)
cg17347335	-2.63537	0.508122	2.14293e-07	0.0064126	chr11	93583973	C11orf90	S_Shore	VSTM5 (-277)
cg01614101	3.42287	0.661975	2.33225e-07	0.00669406	chr11	113778771	HTR3B	OpenSea	HTR3A (-67025), HTR3B (+3373)
cg02161737	-2.57406	0.499599	2.57375e-07	0.00669406	chr22	40917443	LOC101927257;MKL1;MKL1;MKL1	OpenSea	MKL1 (+115245), SGSM3 (+150829)
cg12054981	-3.21258	0.624224	2.6536e-07	0.00669406	chr8	42037387	PLAT;PLAT	OpenSea	AP3M2 (+26924), PLAT (+27854)
cg15842218	-1.82203	0.354115	2.67071e-07	0.00669406	chr8	141490124		OpenSea	CHRAC1 (-31272), TRAPPC9 (-21447)
cg22043745	-1.44216	0.280509	2.72971e-07	0.00669406	chr8	11565527	GATA4;GATA4;GATA4;GATA4	Island	C8orf49 (-53368), GATA4 (+3815)
cg00791024	1.36188	0.265349	2.86056e-07	0.00669406	chr15	97491152		OpenSea	SPATA8 (+164534)
cg27124856	-1.27949	0.249306	2.86334e-07	0.00669406	chr16	31499881	SLC5A2;SLC5A2	Island	SLC5A2 (+5443), C16orf58 (+19852)
cg07446248	2.54646	0.49695	2.98846e-07	0.00676631	chr6	88956517		OpenSea	CNR1 (-95636), RNGTT (+716797)
cg23905620	-1.78673	0.349054	3.07513e-07	0.00676631	chr7	68132965		OpenSea	AUTS2 (-931353)
cg21797793	1.37386	0.269044	3.28247e-07	0.00701615	chr4	37897540	TBC1D1;TBC1D1	OpenSea	PTTG2 (-64515), TBC1D1 (+4833)
cg21848924	1.39085	0.273501	3.6696e-07	0.00759708	chr19	46476996	NOVA2	OpenSea	NOVA2 (-193)
cg12187687	-2.27926	0.448703	3.78098e-07	0.00759708	chr7	27253834		Island	EVX1 (-28329), HOXA13 (-14110)
cg04288961	-2.28941	0.451045	3.8589e-07	0.00759708	chr14	95513394		OpenSea	GSC (-276833), DICER1 (+110952)
cg11207533	-2.9534	0.583287	4.11904e-07	0.00785255	chr17	46679361	HOXB-AS3;HOXB-AS3;HOXB-AS3;HOXB-AS3;HOXB-AS3;HOXB-AS3;HOXB-AS3;HOXB-AS3;HOXB6	S_Shelf	HOXB5 (-8039), HOXB6 (+2992)
cg24204740	1.03403	0.204364	4.1986e-07	0.00785255	chr6	83903813	PGM3;RWDD2A	S_Shore	PGM3 (-181)
cg07967498	-1.9569	0.387519	4.42237e-07	0.00801454	chr14	89059881	ZC3H14;ZC3H14;ZC3H14;ZC3H14;ZC3H14;ZC3H14	OpenSea	ZC3H14 (+30629), EML5 (+199214)
cg14727987	-2.00044	0.396401	4.49947e-07	0.00801454	chr5	72485634		OpenSea	TMEM174 (+16613), FOXD1 (+258717)
cg23484899	-1.5246	0.30274	4.75325e-07	0.00826968	chr1	244894365		Island	COX20 (-104258), DESI2 (+78129)
cg19554328	-1.47126	0.293974	5.5941e-07	0.00921639	chr21	33909943		OpenSea	TCP10L (+47899), EVA1C (+125255)
cg24846343	2.27147	0.453972	5.62825e-07	0.00921639	chr22	24311635	DDTL	S_Shore	DDTL (+2547), DDT (+5137)
cg19554565	1.21518	0.242927	5.66698e-07	0.00921639	chr14	31028155	G2E3	Island	G2E3 (-173)
cg15312110	2.27301	0.45818	7.01495e-07	0.0111303	chr8	77585789	ZFHX4-AS1	OpenSea	ZFHX4 (-7664)
cg06522288	1.4231	0.287061	7.1414e-07	0.0111303	chr8	77586439	LOC100192378	N_Shelf	ZFHX4 (-7014)
cg11435153	-1.51284	0.305686	7.46021e-07	0.0113899	chr10	89463417	PAPSS2;PAPSS2	OpenSea	PAPSS2 (+43942), ATAD1 (+114499)
cg02643677	-2.56183	0.518083	7.62131e-07	0.0114032	chr3	69997232	MITF;MITF;MITF;MITF;MITF;MITF	OpenSea	MITF (+208647)
cg24585372	-1.54099	0.312477	8.15921e-07	0.0119686	chr20	36405510	CTNNBL1;CTNNBL1	OpenSea	VSTM2L (-125995), CTNNBL1 (+83103)
cg09579623	1.82482	0.371072	8.75666e-07	0.012598	chr6	150461119		N_Shelf	PPP1R14C (-3092)
cg00764668	-1.21432	0.247201	9.00135e-07	0.0127057	chr19	18108895	KCNN1	Island	ARRDC2 (-10081), KCNN1 (+46794)
cg01291856	-0.628062	0.127966	9.19906e-07	0.0127443	chr11	1706894	HCCA2;FAM99B	OpenSea	KRTAP5-6 (-11530), KRTAP5-5 (+55862)
cg13693278	-1.49464	0.304922	9.50128e-07	0.012856	chr16	86976371		OpenSea	FOXL1 (+364257), FBXO31 (+440991)
cg09557342	-1.15267	0.235277	9.62336e-07	0.012856	chr8	30014267	DCTN6	Island	DCTN6 (+455)
cg06099431	-5.58364	1.14065	9.8234e-07	0.012893	chr20	44451667		Island	TNNC2 (+4312), UBE2C (+10453)
cg26564960	1.51653	0.310298	1.02207e-06	0.0131832	chr1	6082758		N_Shelf	NPHP4 (-30228), KCNAB2 (-23222)
cg00033450	5.116	1.0492	1.08218e-06	0.0137219	chr4	25970375		OpenSea	RBPJ (-350956), SMIM20 (+54550)
cg04607521	-1.69572	0.349236	1.20085e-06	0.0149728	chr4	3231885	HTT	OpenSea	RGS12 (-83988), HTT (+155478)
cg04105350	2.68195	0.554022	1.29269e-06	0.0158537	chr1	2111868	PRKCZ;PRKCZ;PRKCZ	OpenSea	C1orf86 (+14344), PRKCZ (+129960)
cg17024258	-2.03763	0.421879	1.36615e-06	0.0164844	chr1	160370982	VANGL2	S_Shore	VANGL2 (+607)
cg21594924	2.55779	0.530583	1.43043e-06	0.0169861	chr9	17811008		OpenSea	ADAMTSL1 (-662883), SH3GL2 (+231888)
cg13465645	-2.12438	0.441617	1.5059e-06	0.0176029	chr19	3578711	HMG20B	S_Shore	GIPC3 (-6839), HMG20B (+5776)
cg02628895	0.944104	0.196607	1.57095e-06	0.0179918	chr17	43313141	FMNL1	OpenSea	FMNL1 (+13986), SPATA32 (+26337)
cg00981472	-1.31059	0.273267	1.61872e-06	0.0179918	chr2	31456761	EHD3	Island	EHD3 (-441)
cg08263800	-2.25099	0.469536	1.63431e-06	0.0179918	chr1	93720807	CCDC18;CCDC18	OpenSea	DR1 (-90637), TMED5 (-74523)
cg01278701	2.00298	0.417973	1.65032e-06	0.0179918	chr11	102631387		OpenSea	MMP8 (-35703), MMP10 (+19971)
cg15331007	-1.54366	0.3222	1.65942e-06	0.0179918	chr1	18418686		OpenSea	IGSF21 (-15553), ACTL8 (+336879)
cg10724947	1.38665	0.290197	1.76767e-06	0.0188916	chr15	62359485	C2CD4A	N_Shore	C2CD4A (+310)
cg16957993	-2.23654	0.469058	1.85913e-06	0.0194165	chr2	42755932		OpenSea	MTA3 (-39724), KCNG3 (-34696)
cg16048920	-1.04093	0.218423	1.88219e-06	0.0194165	chr19	18358923	PDE4C	OpenSea	RAB3A (-44040), PDE4C (+7305)
cg05796825	-2.65697	0.557678	1.89465e-06	0.0194165	chr6	116872161	FAM26D;FAM26D;FAM26D;FAM26D	OpenSea	RWDD1 (-20368), TRAPPC3L (-5389)
cg26470766	1.63961	0.3445	1.9419e-06	0.0196319	chr9	37758891	TRMT10B;TRMT10B;TRMT10B;TRMT10B;TRMT10B;TRMT10B;TRMT10B	OpenSea	TRMT10B (+5078), EXOSC3 (+26162)
cg01798062	1.68891	0.355775	2.06326e-06	0.0202948	chr5	125379942		OpenSea	GRAMD3 (-315881)
cg04105737	1.14929	0.24215	2.07278e-06	0.0202948	chr11	112384214	LOC101928823	OpenSea	NCAM1 (-447943), PLET1 (-252632)
cg02554691	-1.56755	0.330384	2.08886e-06	0.0202948	chr6	132646680	MOXD1	OpenSea	CTGF (-374168), MOXD1 (+76003)
cg13916989	-1.22601	0.258803	2.16674e-06	0.0207816	chr1	154742820	KCNN3;KCNN3	N_Shore	ADAR (-162139), KCNN3 (+99935)
cg26843278	-1.41512	0.299053	2.22309e-06	0.0210522	chr10	131194523		OpenSea	MGMT (-70924)
cg26960562	1.35921	0.287421	2.25639e-06	0.0211004	chr17	11501660	DNAH9	Island	DNAH9 (-87)
cg01815529	2.28612	0.485383	2.47793e-06	0.0228267	chr20	17206946	PCSK2	Island	PCSK2 (-689)
cg02260576	1.22942	0.261137	2.50202e-06	0.0228267	chr17	2255949	SGSM2;SGSM2	OpenSea	SGSM2 (+15144), MNT (+48462)
cg01590948	-1.2616	0.26848	2.61384e-06	0.0235595	chr5	150004773	SYNPO;SYNPO	Island	MYOZ3 (-35670), SYNPO (+24132)
cg02919526	-1.03391	0.22035	2.70398e-06	0.023916	chr11	118758721	CXCR5	OpenSea	CXCR5 (+4247), BCL9L (+22891)
cg07833104	-0.902742	0.192437	2.71732e-06	0.023916	chr1	109797333	CELSR2	N_Shelf	CELSR2 (+4693), PSRC1 (+28456)
cg05288192	-0.912969	0.195327	2.95311e-06	0.0243945	chr17	80893564	TBCD	OpenSea	ZNF750 (-95111), B3GNTL1 (+116121)
cg14340422	-1.38396	0.296096	2.95352e-06	0.0243945	chr1	200011860	NR5A2;NR5A2;NR5A2	Island	NR5A2 (+15131), ZNF281 (+367323)
cg20773211	2.90525	0.6216	2.95644e-06	0.0243945	chr5	74632494	HMGCR;HMGCR	Island	HMGCR (-498)
cg02926035	-1.96612	0.42071	2.9633e-06	0.0243945	chr15	57618604		Island	CGNL1 (-50098), TCF12 (+407784)
cg12815987	-0.996264	0.213185	2.96479e-06	0.0243945	chr14	91719608	GPR68	Island	GPR68 (+660)
cg26353694	-1.48592	0.317975	2.96734e-06	0.0243945	chr1	4841940	AJAP1	OpenSea	AJAP1 (+126836)
cg16050357	-1.31743	0.282938	3.21987e-06	0.0261829	chr17	56739925	TEX14;TEX14	S_Shore	SEPT4 (-121747), TEX14 (+29458)
cg02369313	0.938609	0.201697	3.2624e-06	0.0262434	chr6	7590312	SNRNP48	N_Shore	SNRNP48 (-119)
cg26769700	0.957389	0.206114	3.40168e-06	0.0267324	chr8	140945810	TRAPPC9;TRAPPC9	OpenSea	C8orf17 (+2395), TRAPPC9 (+522867)
cg13617202	-0.914909	0.19702	3.42177e-06	0.0267324	chr17	49025289		S_Shelf	TOB1 (-81584), SPAG9 (+172936)
cg24813021	-1.26279	0.271964	3.43038e-06	0.0267324	chr7	47491557	TNS3	OpenSea	TNS3 (+87641)
cg21954572	1.27147	0.274366	3.58288e-06	0.0274817	chr1	20511920	UBXN10;UBXN10-AS1	N_Shore	UBXN10 (-657)
cg15960407	1.67978	0.362664	3.62522e-06	0.0274817	chr19	47949624	SLC8A2	N_Shore	MEIS3 (-27080), SLC8A2 (+25800)
cg27396102	1.98215	0.428006	3.63674e-06	0.0274817	chr14	91267733	TTC7B	OpenSea	TTC7B (+15027), CALM1 (+404407)
cg18285280	-0.896957	0.194241	3.87941e-06	0.0287226	chr6	31141797	PSORS1C3	OpenSea	POU5F1 (-3328)
cg03985181	1.5714	0.340371	3.89846e-06	0.0287226	chr19	34907263	PDCD2L	OpenSea	UBA2 (-12004), PDCD2L (+11975)
cg22992573	-2.18765	0.473949	3.91613e-06	0.0287226	chr12	95611779	VEZT;FGD6	Island	FGD6 (-540), VEZT (+258)
cg24577485	1.56075	0.338421	3.99062e-06	0.0289848	chr19	54825257	LILRA5;LILRA5;LILRA5;LILRA5	OpenSea	LILRA5 (-849)
cg12546556	-1.87842	0.408359	4.22666e-06	0.029804	chr12	104053179	STAB2	OpenSea	STAB2 (+72129), NT5DC3 (+181795)
cg20464072	0.954363	0.207508	4.24176e-06	0.029804	chr1	25943790	MAN1C1	N_Shore	MAN1C1 (-168)
cg19323066	-1.56807	0.340975	4.24931e-06	0.029804	chr7	30928887	FAM188B;INMT-FAM188B	OpenSea	AQP1 (-22582), ENSG00000250424 (+35878)
cg02725398	-4.25092	0.924486	4.26277e-06	0.029804	chr3	9988144	PRRT3	Island	PRRT3 (+5933), CRELD1 (+12605)
cg08536228	1.73411	0.377373	4.323e-06	0.0299453	chr3	63264063	SYNPR;SYNPR	Island	SYNPR (+265)
cg22495165	-1.36752	0.297831	4.39886e-06	0.0300795	chr18	75310128		OpenSea	GALR1 (+347624)
cg02573238	2.14911	0.46817	4.42279e-06	0.0300795	chr14	93369069		OpenSea	CHGA (-20355), GOLGA5 (+108494)
cg00400263	2.28347	0.498008	4.5353e-06	0.0303855	chr20	58514201	C20orf177;PPP1R3D	Island	PPP1R3D (+1150), FAM217B (+5383)
cg27102141	1.88632	0.411709	4.61273e-06	0.0303855	chr10	131843798		Island	GLRX3 (-90864), EBF3 (-81694)
cg07457613	1.60016	0.349635	4.72498e-06	0.0303855	chr1	205473559	CDK18;CDK18;CDK18	N_Shore	CDK18 (-166)
cg14320530	1.88784	0.412624	4.75714e-06	0.0303855	chr10	134693097		Island	NKX6-2 (-93542), TTC40 (+62991)
cg23409774	2.996	0.654952	4.77624e-06	0.0303855	chr5	175300141	CPLX2;CPLX2	S_Shore	CPLX2 (+76829), THOC3 (+95160)
cg09889154	-1.1495	0.251362	4.80616e-06	0.0303855	chr12	132990576		N_Shore	GALNT9 (-300004), FBRSL1 (-75560)
cg02031577	1.5183	0.332087	4.83079e-06	0.0303855	chr5	115421056	COMMD10;COMMD10	Island	COMMD10 (+369)
cg17583667	-2.31341	0.50603	4.83797e-06	0.0303855	chr1	36039356	TFAP2E	Island	TFAP2E (+386)
cg27630512	-1.30743	0.28599	4.84057e-06	0.0303855	chr7	67908055		OpenSea	NONE
cg11342415	2.01119	0.440072	4.87394e-06	0.0303855	chr10	1034284	GTPBP4	Island	GTPBP4 (-53)
cg09803177	-1.62668	0.356106	4.92502e-06	0.0304501	chr16	12898504	CPPED1;CPPED1	S_Shore	CPPED1 (-631)
cg00127198	-1.72336	0.377657	5.03565e-06	0.0308789	chr7	555518	PDGFA;PDGFA	N_Shore	PDGFA (+3512), FAM20C (+362550)
cg08342194	1.40314	0.307898	5.1849e-06	0.031334	chr6	31683075	LY6G6E;LY6G6E;LY6G6D	OpenSea	LY6G6D (-57)
cg04663750	1.39857	0.307029	5.2338e-06	0.031334	chr20	25013229	ACSS1;ACSS1;ACSS1;ACSS1;ACSS1	OpenSea	APMAP (-39615), ACSS1 (+25588)
cg26554385	-0.88485	0.19432	5.27424e-06	0.031334	chr1	154977246	ZBTB7B;ZBTB7B;ZBTB7B;ZBTB7B;ZBTB7B	S_Shore	ZBTB7B (+1952), DCST2 (+28989)
cg02291032	2.21435	0.486302	5.2774e-06	0.031334	chr7	3038540	CARD11	OpenSea	GNA12 (-154583), CARD11 (+45038)
cg15266268	-1.74737	0.384054	5.36977e-06	0.0313885	chr12	107691030		OpenSea	CRY1 (-203424), BTBD11 (-21159)
cg00728147	-1.59588	0.35076	5.37049e-06	0.0313885	chr20	62750763		OpenSea	MYT1 (-45063), NPBWR2 (-12240)
cg05033529	-1.23277	0.271056	5.41465e-06	0.0314013	chr19	12624786	ZNF709	S_Shore	ZNF709 (-29144), ZNF564 (+37556)
cg20392347	-1.90899	0.420258	5.56088e-06	0.0320012	chr10	114361333	VTI1A	OpenSea	TCF7L2 (-348675), VTI1A (+154318)
cg27224699	-1.16827	0.257308	5.61597e-06	0.0320609	chr15	99980418		OpenSea	MEF2A (-125486), LRRC28 (+188852)
cg02742119	-1.30513	0.28767	5.70832e-06	0.0320609	chr1	7449957	CAMTA1	OpenSea	VAMP3 (-381371), CAMTA1 (+604574)
cg01119135	0.874805	0.192856	5.73146e-06	0.0320609	chr1	207205525	C1orf116;C1orf116	OpenSea	C1orf116 (+566)
cg01881064	-1.66519	0.367139	5.74445e-06	0.0320609	chr1	54396087	HSPB11	OpenSea	HSPB11 (+15514), DIO1 (+36228)
cg22702259	1.46074	0.322235	5.8113e-06	0.0320609	chr17	38490520	RARA;RARA;RARA	OpenSea	RARA (+25075), GJD3 (+29546)
cg11606775	-1.12687	0.248618	5.82838e-06	0.0320609	chr7	4188820	SDK1;SDK1	OpenSea	FOXK1 (-533119), SDK1 (+847741)
cg18423962	1.64884	0.364537	6.09391e-06	0.0328731	chr11	111945365	C11orf57;C11orf57;PIH1D2;C11orf57;C11orf57;C11orf57;PIH1D2	Island	PIH1D2 (-471), C11orf57 (+326)
cg05484618	-1.37421	0.3039	6.12789e-06	0.0328731	chr9	140066754	TMEM210	S_Shore	LRRC26 (-2252), TMEM210 (+106)
cg27340283	-1.32922	0.294037	6.16692e-06	0.0328731	chr11	45199222	PRDM11	N_Shelf	PRDM11 (+30329), SYT13 (+108647)
cg02551218	-3.23543	0.715849	6.19232e-06	0.0328731	chr8	49540270	LOC101929268	OpenSea	EFCAB1 (+107520), UBE2V2 (+619311)
cg24340970	0.886566	0.19616	6.19575e-06	0.0328731	chr10	124030898	BTBD16;BTBD16	OpenSea	BTBD16 (+78)
cg03793582	-1.46342	0.324472	6.47755e-06	0.0336844	chr6	136644760		OpenSea	BCLAF1 (-33772), MAP7 (+202849)
cg14239640	-1.13973	0.252712	6.48359e-06	0.0336844	chr15	80872968	MIR5572;ARNT2	OpenSea	ABHD17C (-114675), ARNT2 (+176276)
cg16539346	-1.63271	0.362023	6.48373e-06	0.0336844	chr11	64571673	MEN1;MEN1;MEN1;MEN1;MEN1;MEN1;MEN1;MAP4K2	S_Shore	MAP4K2 (-961)
cg26062856	-1.02971	0.228394	6.52958e-06	0.0336887	chr15	26109425	ATP10A	S_Shore	ATP10A (-1071)
cg11539756	-1.44284	0.320161	6.58774e-06	0.0337559	chr19	688216	PRSS57;PRSS57	N_Shelf	PRSS57 (+7243), FSTL3 (+11825)
cg26124727	-1.25624	0.279164	6.79504e-06	0.0343552	chr12	127226615	LINC00944;LINC00943	OpenSea	NONE
cg11128216	1.56173	0.347053	6.79653e-06	0.0343552	chr11	31825833	PAX6;PAX6;PAX6	Island	PAX6 (+13675), ELP4 (+294537)
cg26341642	-1.50984	0.335711	6.87747e-06	0.034531	chr17	77844970		OpenSea	CBX4 (-31743), TBC1D16 (+164676)
cg09050670	1.26625	0.281882	7.05163e-06	0.0349765	chr16	1521617	CLCN7;CLCN7	N_Shelf	CCDC154 (-27128), CLCN7 (+3963)
cg04414629	2.70461	0.602241	7.09218e-06	0.0349765	chr4	80329633	GK2	OpenSea	GK2 (-262)
cg18639342	4.17157	0.929174	7.13765e-06	0.0349765	chr2	38977756	SFRS7	Island	SRSF7 (+879)
cg00328147	-1.48217	0.330172	7.15321e-06	0.0349765	chr3	189524173	TP63;TP63;TP63;TP63;TP63;TP63	OpenSea	TP63 (+174958), LEPREL1 (+314544)
cg07509708	-2.37499	0.529354	7.23736e-06	0.0351582	chr1	38619210		OpenSea	POU3F1 (-106761), RRAGC (+706284)
cg09567485	-1.39462	0.311084	7.35611e-06	0.0355045	chr16	67203753	HSF4;HSF4	N_Shore	NOL3 (-4151)
cg05628049	1.02554	0.228975	7.50436e-06	0.0359878	chr3	42113624		OpenSea	ULK4 (-109703), TRAK1 (-18937)
cg24774357	2.27978	0.509271	7.58598e-06	0.036008	chr14	77504364		OpenSea	CIPC (-60075), IRF2BPL (-9331)
cg04852518	-1.02407	0.228903	7.68378e-06	0.036008	chr3	52272496	TWF2	N_Shore	TWF2 (+779)
cg22383924	-1.04663	0.23398	7.70733e-06	0.036008	chr1	3590479	TP73	OpenSea	SMIM1 (-98872), TP73 (+21396)
cg16550324	-1.13597	0.254023	7.75281e-06	0.036008	chr6	2245327	GMDS	Island	GMDS (+598)
cg11151544	-0.925937	0.207071	7.76364e-06	0.036008	chr12	56135681	GDF11	N_Shore	GDF11 (-1382)
cg27265118	2.20349	0.492877	7.79736e-06	0.036008	chr3	4344949	SETMAR;SETMAR	N_Shore	SETMAR (-38)
cg18439323	1.77226	0.396615	7.87801e-06	0.0361573	chr14	23755769	HOMEZ	S_Shore	HOMEZ (-444)
cg05427189	1.77462	0.397482	8.02011e-06	0.036585	chr2	169964245		OpenSea	DHRS9 (+42947), LRP2 (+254949)
cg09473060	1.10254	0.247174	8.1734e-06	0.036958	chr17	61864315	DDX42;DDX42	OpenSea	PSMC5 (-40227), DDX42 (+13093)
cg10487127	1.36064	0.305086	8.20068e-06	0.036958	chr6	16761668	ATXN1;ATXN1;ATXN1;ATXN1	Island	ATXN1 (+18)
cg02675634	-1.65393	0.371057	8.29793e-06	0.0371723	chr12	57613173	NXPH4	S_Shelf	SHMT2 (-9936), NXPH4 (+2596)
cg05231308	-1.66906	0.37468	8.40423e-06	0.0372098	chr2	27531163	UCN	Island	UCN (+149)
cg16021126	-1.14767	0.257653	8.41641e-06	0.0372098	chr13	44947611	SERP2	Island	SERP2 (-366)
cg26224169	-1.69051	0.379608	8.4555e-06	0.0372098	chr8	67343584	ADHFE1	N_Shore	ADHFE1 (-1136)
cg02161940	-0.944049	0.212074	8.52649e-06	0.0373027	chr3	16459007	RFTN1	OpenSea	RFTN1 (+96205), OXNAD1 (+152302)
cg15482003	-1.31474	0.295676	8.72596e-06	0.0376361	chr16	2039745	SYNGR3	N_Shore	SYNGR3 (-200)
cg14876940	0.812818	0.182821	8.74913e-06	0.0376361	chr8	37758254	RAB11FIP1;RAB11FIP1	S_Shore	RAB11FIP1 (-1283)
cg03393607	-1.27122	0.285992	8.79199e-06	0.0376361	chr2	100723417	AFF3;AFF3	S_Shelf	AFF3 (-1373)
cg24626003	-3.17095	0.713433	8.80393e-06	0.0376361	chr11	6502573	ARFIP2;FXC1;ARFIP2	Island	TIMM10B (-103), ARFIP2 (-32)
cg19813207	-1.03522	0.233159	8.99745e-06	0.03806	chr17	72292069	DNAI2;DNAI2	OpenSea	KIF19 (-30281), DNAI2 (+14419)
cg19590598	-1.61656	0.364107	9.00483e-06	0.03806	chr2	127782813		Island	BIN1 (+82117), GYPC (+369305)
cg09930046	-0.82958	0.186914	9.06714e-06	0.0381081	chr19	840737	PRTN3	N_Shelf	PRTN3 (-225)
cg13844237	1.76679	0.399085	9.55145e-06	0.0399193	chr9	128284824	MAPKAP1;MAPKAP1;MAPKAP1;MAPKAP1;MAPKAP1;MAPKAP1	OpenSea	MAPKAP1 (+184688), GAPVD1 (+260714)
cg24292594	-1.2108	0.273956	9.88362e-06	0.0410781	chr19	51152922	C19orf81	OpenSea	SYT3 (-11621), SHANK1 (+67272)
cg12621411	-3.74557	0.848523	1.01374e-05	0.0418999	chr11	121065827		OpenSea	SC5D (-97334), TECTA (+93946)
cg14879089	2.04932	0.464724	1.0349e-05	0.0425397	chr4	5828736	CRMP1;CRMP1;CRMP1;CRMP1	OpenSea	CRMP1 (+66048), EVC (+115813)
cg13263950	-1.68083	0.381401	1.04809e-05	0.0427406	chr1	36039396	TFAP2E	Island	TFAP2E (+426)
cg22624022	1.82511	0.414234	1.05308e-05	0.0427406	chr7	55001134		Island	SEC61G (-173468), EGFR (-85659)
cg21099709	-1.14933	0.26097	1.06244e-05	0.0427406	chr16	30710499	LOC730183;SRCAP;SRCAP	S_Shore	SRCAP (+38)
cg05366813	-1.07858	0.244908	1.06264e-05	0.0427406	chr7	30723147	CRHR2;CRHR2;CRHR2;CRHR2;CRHR2	S_Shore	CRHR2 (+16571), GARS (+88851)
cg13108341	4.37681	0.994759	1.08314e-05	0.043332	chr17	11608711	DNAH9	OpenSea	DNAH9 (+106964), ZNF18 (+291977)
cg14430115	1.44718	0.32933	1.11118e-05	0.0441613	chr2	54198660	PSME4	S_Shore	PSME4 (-684)
cg22116708	1.22003	0.277693	1.11567e-05	0.0441613	chr8	18067674	NAT1;NAT1;NAT1;NAT1;NAT1;NAT1;NAT1;NAT1;NAT1;NAT1;NAT1;NAT1;NAT1;NAT1;NAT1;NAT1	OpenSea	NAT1 (+57)
cg26683252	-1.28848	0.29371	1.14977e-05	0.0452378	chr17	54802123		OpenSea	C17orf67 (+109133), NOG (+131064)
cg19631781	-1.21222	0.276428	1.15832e-05	0.0452378	chr18	41826170		OpenSea	SYT4 (-968556), SETBP1 (-434692)
cg07620167	-2.33849	0.533408	1.1649e-05	0.0452378	chr9	140128686	SLC34A3	Island	TUBB4B (-6978), SLC34A3 (+3478)
cg13860688	-1.6373	0.373502	1.16706e-05	0.0452378	chr20	37650491	DHX35;DHX35;DHX35;DHX35;DHX35;DHX35	OpenSea	DHX35 (+59514)
cg25988219	-0.896433	0.204681	1.18861e-05	0.0457465	chr20	3024646	GNRH2;GNRH2;GNRH2;GNRH2	N_Shore	MRPS26 (-1944), GNRH2 (+379)
cg05281645	1.89733	0.433282	1.19241e-05	0.0457465	chr17	33673036		OpenSea	SLFN11 (+27602), SLFN5 (+102982)
cg01879056	1.84438	0.42142	1.20561e-05	0.0460168	chr10	133857567		OpenSea	BNIP3 (-62133), JAKMIP3 (-60607)
cg20871964	-2.5393	0.580711	1.22697e-05	0.0465944	chr2	234844925	TRPM8	N_Shelf	SPP2 (-114417), TRPM8 (+18883)
cg26452226	0.905285	0.207096	1.23487e-05	0.0466576	chr10	3025482		OpenSea	PFKP (-84229)
cg06682010	-1.31395	0.300758	1.24931e-05	0.0467056	chr2	10574257		S_Shore	ODC1 (+14372), HPCAL1 (+130432)
cg17598128	-1.57353	0.360248	1.2544e-05	0.0467056	chr3	119043545	ARHGAP31	S_Shore	ARHGAP31 (+30326), TMEM39A (+138983)
cg08808795	1.90915	0.437193	1.26057e-05	0.0467056	chr10	13740527	FRMD4A	OpenSea	PRPF18 (+111601), FRMD4A (+632355)
cg00051200	-1.75481	0.401858	1.26111e-05	0.0467056	chr22	43637194	SCUBE1	OpenSea	TTLL12 (-54056), SCUBE1 (+102199)
cg01677601	1.18144	0.2707	1.27485e-05	0.0469819	chr11	12399777	PARVA	Island	TEAD1 (-366810), PARVA (+1046)
cg26708596	-1.67218	0.383544	1.30179e-05	0.0476978	chr8	49577641	LOC101929268	OpenSea	EFCAB1 (+70149), UBE2V2 (+656682)
cg05701192	2.71209	0.622192	1.30703e-05	0.0476978	chr10	21388541	NEBL;NEBL	OpenSea	MLLT10 (-434730), NEBL (-202011)
cg15036595	-1.47722	0.339007	1.31555e-05	0.0477717	chr11	125818934		OpenSea	DDX25 (+44677), CDON (+114252)
cg14080585	-1.71234	0.393058	1.32183e-05	0.0477717	chr20	60639721	TAF4	Island	TAF4 (+1144), CDH4 (+812240)
cg19917412	-2.55381	0.586437	1.332e-05	0.0478056	chr11	64815189	NAALADL1	Island	SAC3D1 (+6814), NAALADL1 (+10831)
cg22575179	-1.37628	0.316111	1.33807e-05	0.0478056	chr17	47325413	FLJ40194	OpenSea	PHOSPHO1 (-17286), ZNF652 (+114421)
cg26265835	-1.50032	0.344651	1.34194e-05	0.0478056	chr5	180467077	BTNL9;BTNL9	OpenSea	BTNL9 (-147)
cg05672337	-1.92364	0.442307	1.36698e-05	0.0484671	chr12	86580421	MGAT4C	OpenSea	MGAT4C (+69623), NTS (+312347)
cg12528214	-1.16554	0.268366	1.4048e-05	0.0495047	chr17	34110924	MMP28;MMP28;MMP28;MMP28	OpenSea	GAS2L2 (-31028), MMP28 (+11786)
cg01700248	1.0914	0.251337	1.40948e-05	0.0495047	chr9	92074357	SEMA4D;SEMA4D	OpenSea	GADD45G (-145570), SEMA4D (-40610)
cg24335984	-0.880991	0.202935	1.41674e-05	0.0495272	chr3	50361554	HYAL2	S_Shore	HYAL2 (-1342)
ch.11.102211250F	2.38501	0.549579	1.4267e-05	0.0496434	chr11	102706040		OpenSea	MMP1 (-37150), MMP3 (+8493)

## Sheet: Table S3
Table S3: Baseline urate-associated CpG in females that reached epigenome-wide significance with FDR adjusted P below 0.05
probeID	BETA	SE	P_VAL	padj	chr_hg19	pos_hg19	UCSC_RefGene_Name	Relation_to_Island	Gene (distance to TSS) (Annotation with Great tool)
cg00864618	-1.83209	0.355882	2.63233e-07	0.0395529	chr8	141518479		N_Shelf	CHRAC1 (-2,917)
cg03791307	3.07723	0.517023	2.65172e-09	0.00199222	chr2	198299216	SF3B1;SF3B1;SF3B1	N_Shore	SF3B1 (+598)
cg14294217	-1.66375	0.32227	2.43552e-07	0.0395529	chr16	49707711	ZNF423;ZNF423	OpenSea	ZNF423 (+148,938), C16orf78 (+299,978)
cg17844602	-2.07252	0.378947	4.52162e-08	0.0169853	chr18	12411141	SLMO1;SLMO1	S_Shelf	SLMO1 (+3,247), SPIRE1 (+246,991)
cg26671583	1.21424	0.227557	9.50262e-08	0.0237974	chr11	57435019	ZDHHC5	S_Shore	ZDHHC5 (-348)

## Sheet: Table S4
Table S4: eQTM of the urate-associated CpG sites identified in males
CpG_Name	Cpg_Chr	CpG_ChrPos	ProbeName	ProbeChr	ProbeCenterChrPos	CisTrans	OverallZScore	HGNCName	PValue	FDR
cg02725398	3	9988096	ENSG00000163703	3	9975506	cis	-23.3039	CRELD1	4.04e-120	0
cg19917412	11	64815141	ENSG00000168060	11	64826021	cis	-6.70979	NAALADL1	1.95e-11	0
cg09050670	16	1521617	ENSG00000103249	16	1525581	cis	-5.01273	CLCN7	5.37e-07	0.000151
cg05231308	2	27531163	ENSG00000163794	2	27531313	cis	4.78894	UCN	1.68e-06	0.000546
cg07620167	9	140128638	ENSG00000188986	9	140149625	cis	4.16905	NELFB	3.06e-05	0.007278
cg07620167	9	140128638	ENSG00000188566	9	140100147	cis	3.91724	NDOR1	8.95e-05	0.0185196
cg26062856	15	26109425	ENSG00000206190	15	26110317	cis	-3.89164	ATP10A	9.96e-05	0.0202414
cg08342194	6	31683027	ENSG00000204428	6	31651817	cis	-3.81021	LY6G5C	0.0001389	0.0263134
cg09930046	19	840689	ENSG00000172232	19	825097	cis	3.6503	AZU1	0.0002618	0.044485

## Sheet: Table S5
Table S5: Urate-associated CpG sites (from males) in discovery cohort and replication cohorts
	BCG				NAS						500FG							Meta-analysis of 500FG and NAS
probeID	bcg_beta	bcg_se	bcg_pval	bcg_padj	nas_beta	nas_se	nas_pval	nas_padj	bcg_nas_comparison (same: same effect direction, diff: different effect direction)	bcg_nas_nominalp (sig: P < 0.05, no: P > 0.05)	500fg_probeID	500fg_beta	500fg_se	500fg_pval	500fg_padj	bcg_500fg_comparison (same: same effect direction, diff: different effect direction)	bcg_500fg_nominalp (sig: P < 0.05, no: P > 0.05)	Effect	StdErr	P-value	Direction	bcg_meta (same: Effect, Direction are consistent with the bcg cohort, diff: different effect direction of either Effect or Direction with discovery cohort)	bcg_meta_nominalp (sig: P < 0.05, no: P > 0.05)	meta_padj
cg17828057	-3.88858	0.629123	6.37157e-10	0.000476665	2.2156e-05	0.00174688	0.989884	0.989884	diff	no
cg10115985	-2.0443	0.346477	3.62942e-09	0.00104153
cg08601457	2.07968	0.353864	4.17665e-09	0.00104153	-0.000858951	0.000511067	0.0932357	0.52172	diff	no	cg08601457_BC21	0.114315	0.127922	0.371521	0.833262	same	no	-0.0009	0.0005	0.09352	+-	diff	no	0.405846
cg14914220	2.85683	0.491545	6.17538e-09	0.00115497	0.000196465	0.000413322	0.6347	0.989884	same	no	cg14914220_TC21	-0.0729246	0.0991983	0.462255	0.846945	diff	no	0.0002	0.0004	0.6367	-+	diff	no	0.957173
cg04233669	2.58572	0.451326	1.00936e-08	0.00151023	-0.000499762	0.00244584	0.838149	0.989884	diff	no
cg15994304	4.27433	0.759253	1.80577e-08	0.00225153							cg15994304_TC21	0.0510212	0.140703	0.716891	0.945276	same	no
cg20005968	1.58385	0.284261	2.52111e-08	0.00269439							cg20005968_TC21	0.12008	0.0870643	0.167828	0.681802	same	no
cg00795900	-3.40492	0.619708	3.92046e-08	0.00366618	0.00010944	0.00115565	0.924578	0.989884	diff	no
cg18400281	1.97463	0.361129	4.55298e-08	0.0037846	0.00142184	0.000856986	0.0975178	0.52172	same	no	cg18400281_TC21	0.0273597	0.0994393	0.783209	0.960539	same	no	0.0014	0.0009	0.09663	++	same	no	0.405846
cg02371824	-2.21373	0.40855	6.00995e-08	0.00428397							cg02371824_TC21	0.370853	0.136729	0.00668118	0.173711	diff	no
cg21003249	1.095	0.20284	6.72563e-08	0.00428397	-0.000188899	0.000299727	0.528737	0.989884	diff	no	cg21003249_TC21	-0.0106895	0.103154	0.917466	0.969267	diff	no	-0.0002	0.0003	0.5283	--	diff	no	0.925419
cg07388700	-1.28315	0.238001	6.99231e-08	0.00428397	-0.00256953	0.00145723	0.0782598	0.482526	same	no	cg07388700_TC11	0.0453435	0.131106	0.729452	0.945276	diff	no	-0.0026	0.0015	0.07852	+-	diff	no	0.387983
cg14569988	1.96485	0.365959	7.91532e-08	0.00428397
cg17326451	1.89558	0.353208	8.01693e-08	0.00428397	-0.00456969	0.00223001	0.04079	0.396775	diff	no	cg17326451_BC21	0.107599	0.105408	0.307355	0.786841	same	no	-0.0045	0.0022	0.04265	+-	diff	no	0.31689
cg15172529	7.51322	1.4045	8.8241e-08	0.00434848	-9.35138e-05	0.000224181	0.676719	0.989884	diff	no	cg15172529_TC21	0.336007	0.334675	0.315387	0.786841	same	no	-0.0001	0.0002	0.6771	+-	diff	no	0.957173
cg00528779	2.9358	0.549787	9.30016e-08	0.00434848	-0.00088661	0.000443588	0.0460083	0.41024	diff	no	cg00528779_BC21	-0.135275	0.132086	0.305766	0.786841	diff	no	-0.0009	0.0004	0.04527	--	diff	no	0.31689
cg18400331	2.30828	0.434401	1.07412e-07	0.00472683							cg18400331_TC21	-0.305282	0.0793047	0.000118366	0.0153876	diff	no
cg20348932	0.923797	0.174655	1.22812e-07	0.00510428
cg26731327	-2.47849	0.470851	1.41071e-07	0.00519131	0.000195426	0.000164467	0.235117	0.776676	diff	no
cg00402381	-2.23957	0.425713	1.43458e-07	0.00519131	-0.00334159	0.00189073	0.0775755	0.482526	same	no
cg09263024	-1.34994	0.257033	1.50446e-07	0.00519131	0.00049698	0.00148588	0.738119	0.989884	diff	no
cg10400227	2.07861	0.396066	1.53632e-07	0.00519131
cg18932116	-2.11321	0.403199	1.59602e-07	0.00519131
cg24604013	1.63822	0.314142	1.83931e-07	0.00573338	0.00146125	0.00064675	0.0241532	0.396775	same	sig	cg24604013_BC11	-0.0232171	0.184076	0.89963	0.969267	diff	no	0.0015	0.0006	0.02389	-+	diff	no	0.31689
cg17347335	-2.63537	0.508122	2.14293e-07	0.0064126	0.000919185	0.0019655	0.640162	0.989884	diff	no	cg17347335_TC21	-0.0576694	0.113393	0.611046	0.913057	same	no	0.0009	0.002	0.6464	-+	diff	no	0.957173
cg01614101	3.42287	0.661975	2.33225e-07	0.00669406	0.000189778	0.000230242	0.410067	0.975049	same	no
cg02161737	-2.57406	0.499599	2.57375e-07	0.00669406
cg12054981	-3.21258	0.624224	2.6536e-07	0.00669406	0.00113674	0.00233705	0.626822	0.989884	diff	no
cg15842218	-1.82203	0.354115	2.67071e-07	0.00669406	-0.00326369	0.00185969	0.0796741	0.482526	same	no	cg15842218_TC21	0.0436392	0.135255	0.746964	0.945276	diff	no	-0.0033	0.0019	0.08006	+-	diff	no	0.387983
cg22043745	-1.44216	0.280509	2.72971e-07	0.00669406
cg00791024	1.36188	0.265349	2.86056e-07	0.00669406	0.000198924	0.000316181	0.529448	0.989884	same	no
cg27124856	-1.27949	0.249306	2.86334e-07	0.00669406							cg27124856_TC21	-0.142774	0.143804	0.320789	0.786841	same	no
cg07446248	2.54646	0.49695	2.98846e-07	0.00676631							cg07446248_TC21	-0.0260693	0.163435	0.873268	0.969267	diff	no
cg23905620	-1.78673	0.349054	3.07513e-07	0.00676631
cg21797793	1.37386	0.269044	3.28247e-07	0.00701615
cg21848924	1.39085	0.273501	3.6696e-07	0.00759708							cg21848924_BC11	-0.0698694	0.104915	0.505435	0.865753	diff	no
cg12187687	-2.27926	0.448703	3.78098e-07	0.00759708	-0.00269327	0.00221135	0.223627	0.771875	same	no
cg04288961	-2.28941	0.451045	3.8589e-07	0.00759708
cg11207533	-2.9534	0.583287	4.11904e-07	0.00785255							cg11207533_BC21	0.0732325	0.110145	0.506132	0.865753	diff	no
cg24204740	1.03403	0.204364	4.1986e-07	0.00785255	0.000115136	0.000174111	0.50864	0.989884	same	no	cg24204740_TC21	-0.0361975	0.114068	0.750992	0.945276	diff	no	0.0001	0.0002	0.5087	-+	diff	no	0.925419
cg07967498	-1.9569	0.387519	4.42237e-07	0.00801454	-0.000318771	0.000308914	0.302454	0.829809	same	no	cg07967498_BC21	0.0994582	0.115302	0.388363	0.845506	diff	no	-0.0003	0.0003	0.3032	+-	diff	no	0.734677
cg14727987	-2.00044	0.396401	4.49947e-07	0.00801454	0.000341921	0.00241769	0.887572	0.989884	diff	no	cg14727987_TC21	0.033987	0.180961	0.851023	0.969267	diff	no	0.0003	0.0024	0.8856	++	diff	no	0.957173
cg23484899	-1.5246	0.30274	4.75325e-07	0.00826968	-0.00393229	0.00186729	0.035545	0.396775	same	sig	cg23484899_TC21	0.0658241	0.104441	0.528531	0.892325	diff	no	-0.0039	0.0019	0.03624	+-	diff	no	0.31689
cg19554328	-1.47126	0.293974	5.5941e-07	0.00921639							cg19554328_BC21	-0.0532182	0.0531594	0.316775	0.786841	same	no
cg24846343	2.27147	0.453972	5.62825e-07	0.00921639	0.00354919	0.00110922	0.00143327	0.15336	same	sig	cg24846343_TC21	0.0340867	0.10499	0.745433	0.945276	same	no	0.0036	0.0011	0.00136	++	same	sig	0.08568
cg19554565	1.21518	0.242927	5.66698e-07	0.00921639	-2.96124e-05	8.78175e-05	0.73606	0.989884	diff	no
cg15312110	2.27301	0.45818	7.01495e-07	0.0111303							cg15312110_BC21	0.214371	0.118411	0.0702337	0.410827	same	no
cg06522288	1.4231	0.287061	7.1414e-07	0.0111303	-0.000627742	0.000437942	0.152166	0.740079	diff	no	cg06522288_BC11	0.0686482	0.0580541	0.237012	0.786841	same	no	-0.0006	0.0004	0.1543	+-	diff	no	0.571818
cg11435153	-1.51284	0.305686	7.46021e-07	0.0113899							cg11435153_BC21	0.00524829	0.092311	0.954661	0.969267	diff	no
cg02643677	-2.56183	0.518083	7.62131e-07	0.0114032	-0.000331597	0.00057828	0.566541	0.989884	same	no
cg24585372	-1.54099	0.312477	8.15921e-07	0.0119686							cg24585372_TC21	-0.053048	0.0791618	0.50278	0.865753	same	no
cg09579623	1.82482	0.371072	8.75666e-07	0.012598	-4.69504e-05	0.000202001	0.816272	0.989884	diff	no
cg00764668	-1.21432	0.247201	9.00135e-07	0.0127057	-0.00178479	0.00126736	0.15946	0.741836	same	no	cg00764668_TC21	-0.1832	0.0537023	0.00064628	0.0420082	same	sig	-0.0019	0.0013	0.1367	--	same	no	0.538256
cg01291856	-0.628062	0.127966	9.19906e-07	0.0127443	-0.000808163	0.000660734	0.221674	0.771875	same	no
cg13693278	-1.49464	0.304922	9.50128e-07	0.012856
cg09557342	-1.15267	0.235277	9.62336e-07	0.012856	-1.83094e-05	0.000132799	0.890378	0.989884	same	no
cg06099431	-5.58364	1.14065	9.8234e-07	0.012893	0.000104642	0.00207812	0.959854	0.989884	diff	no
cg26564960	1.51653	0.310298	1.02207e-06	0.0131832	2.65139e-05	0.000985799	0.97855	0.989884	same	no	cg26564960_TC21	0.0644328	0.0711781	0.365342	0.833262	same	no	0	0.001	0.9685	++	diff	no	0.9687
cg00033450	5.116	1.0492	1.08218e-06	0.0137219							cg00033450_TC21	-0.533297	0.35404	0.131986	0.61279	diff	no
cg04607521	-1.69572	0.349236	1.20085e-06	0.0149728	-7.38286e-05	0.000279433	0.791693	0.989884	same	no	cg04607521_BC21	-0.191149	0.105977	0.0712803	0.410827	same	no	-0.0001	0.0003	0.788	--	same	no	0.957173
cg04105350	2.68195	0.554022	1.29269e-06	0.0158537	-5.37889e-05	0.000128778	0.676295	0.989884	diff	no
cg17024258	-2.03763	0.421879	1.36615e-06	0.0164844	7.06682e-05	0.000612753	0.908215	0.989884	diff	no
cg21594924	2.55779	0.530583	1.43043e-06	0.0169861							cg21594924_BC21	0.0404794	0.237001	0.864382	0.969267	same	no
cg13465645	-2.12438	0.441617	1.5059e-06	0.0176029	-2.66771e-05	7.08377e-05	0.706581	0.989884	same	no
cg02628895	0.944104	0.196607	1.57095e-06	0.0179918							cg02628895_BC21	0.0277493	0.0764134	0.716495	0.945276	same	no
cg00981472	-1.31059	0.273267	1.61872e-06	0.0179918	-1.9791e-05	5.9801e-05	0.740776	0.989884	same	no
cg08263800	-2.25099	0.469536	1.63431e-06	0.0179918							cg08263800_TC21	0.22964	0.0950284	0.0156688	0.217826	diff	no
cg01278701	2.00298	0.417973	1.65032e-06	0.0179918
cg15331007	-1.54366	0.3222	1.65942e-06	0.0179918
cg10724947	1.38665	0.290197	1.76767e-06	0.0188916	9.28416e-05	0.000125429	0.459419	0.989884	same	no	cg10724947_TC21	0.0607882	0.111674	0.586211	0.907232	same	no	0.0001	0.0001	0.4588	++	same	no	0.890591
cg16957993	-2.23654	0.469058	1.85913e-06	0.0194165	0.000252149	0.00142326	0.859428	0.989884	diff	no
cg16048920	-1.04093	0.218423	1.88219e-06	0.0194165							cg16048920_BC21	0.0253231	0.0597467	0.671681	0.934668	diff	no
cg05796825	-2.65697	0.557678	1.89465e-06	0.0194165							cg05796825_TC21	-0.072959	0.123776	0.555562	0.907232	same	no
cg26470766	1.63961	0.3445	1.9419e-06	0.0196319							cg26470766_TC21	0.0817333	0.0757142	0.280366	0.786841	same	no
cg01798062	1.68891	0.355775	2.06326e-06	0.0202948
cg04105737	1.14929	0.24215	2.07278e-06	0.0202948							cg04105737_BC21	-0.0910797	0.0640038	0.154726	0.64885	diff	no
cg02554691	-1.56755	0.330384	2.08886e-06	0.0202948
cg13916989	-1.22601	0.258803	2.16674e-06	0.0207816	0.000307814	0.000239385	0.198897	0.771875	diff	no	cg13916989_BC21	-0.0629707	0.131797	0.632803	0.914049	same	no	0.0003	0.0002	0.1988	-+	diff	no	0.6357
cg26843278	-1.41512	0.299053	2.22309e-06	0.0210522	0.00110897	0.000411378	0.0071846	0.256251	diff	no	cg26843278_TC21	-0.0307584	0.0875241	0.725268	0.945276	same	no	0.0011	0.0004	0.007059	-+	diff	no	0.222358
cg26960562	1.35921	0.287421	2.25639e-06	0.0211004	0.00179827	0.000841065	0.0328345	0.396775	same	sig
cg01815529	2.28612	0.485383	2.47793e-06	0.0228267	-0.000233182	0.000655745	0.722243	0.989884	diff	no
cg02260576	1.22942	0.261137	2.50202e-06	0.0228267							cg02260576_BC21	-0.128062	0.0786604	0.103517	0.538289	diff	no
cg01590948	-1.2616	0.26848	2.61384e-06	0.0235595	-0.00104807	0.000941725	0.266097	0.807044	same	no	cg01590948_TC11	0.0544071	0.0537347	0.311293	0.786841	diff	no	-0.001	0.0009	0.2735	+-	diff	no	0.717938
cg02919526	-1.03391	0.22035	2.70398e-06	0.023916
cg07833104	-0.902742	0.192437	2.71732e-06	0.023916	0.000727134	0.000934686	0.436853	0.989884	diff	no	cg07833104_TC21	-0.0481296	0.0585762	0.411271	0.845506	same	no	0.0007	0.0009	0.4444	-+	diff	no	0.890591
cg05288192	-0.912969	0.195327	2.95311e-06	0.0243945							cg05288192_TC21	-0.0138785	0.0818712	0.86539	0.969267	same	no
cg14340422	-1.38396	0.296096	2.95352e-06	0.0243945							cg14340422_TC21	0.0436271	0.0799911	0.585478	0.907232	diff	no
cg20773211	2.90525	0.6216	2.95644e-06	0.0243945	4.6954e-06	8.94891e-05	0.958169	0.989884	same	no
cg02926035	-1.96612	0.42071	2.9633e-06	0.0243945	6.76261e-06	0.000160637	0.966431	0.989884	diff	no
cg12815987	-0.996264	0.213185	2.96479e-06	0.0243945	0.000957608	0.000428029	0.025564	0.396775	diff	no	cg12815987_TC21	0.0905606	0.181963	0.618704	0.913995	diff	no	0.001	0.0004	0.02519	++	diff	no	0.31689
cg26353694	-1.48592	0.317975	2.96734e-06	0.0243945	0.000317773	0.0003336	0.341123	0.890248	diff	no	cg26353694_TC21	-0.00319538	0.0667353	0.961811	0.969267	same	no	0.0003	0.0003	0.3409	-+	diff	no	0.795433
cg16050357	-1.31743	0.282938	3.21987e-06	0.0261829	0.000103767	0.000509172	0.838569	0.989884	diff	no	cg16050357_TC21	-0.143827	0.100018	0.150432	0.64885	same	no	0.0001	0.0005	0.8442	-+	diff	no	0.957173
cg02369313	0.938609	0.201697	3.2624e-06	0.0262434	1.22412e-05	5.66565e-05	0.829	0.989884	same	no	cg02369313_BC21	-0.0195824	0.107283	0.855166	0.969267	diff	no	0	0.0001	0.829	-+	diff	no	0.957173
cg26769700	0.957389	0.206114	3.40168e-06	0.0267324	0.00104649	0.00120076	0.383746	0.954903	same	no	cg26769700_TC11	-0.0158361	0.0624952	0.799961	0.962916	diff	no	0.001	0.0012	0.3862	-+	diff	no	0.838986
cg13617202	-0.914909	0.19702	3.42177e-06	0.0267324							cg13617202_BC21	-0.0683514	0.0468957	0.144973	0.64885	same	no
cg24813021	-1.26279	0.271964	3.43038e-06	0.0267324
cg21954572	1.27147	0.274366	3.58288e-06	0.0274817
cg15960407	1.67978	0.362664	3.62522e-06	0.0274817							cg15960407_TC21	0.164001	0.0712904	0.0214223	0.223965	same	sig
cg27396102	1.98215	0.428006	3.63674e-06	0.0274817							cg27396102_BC21	0.294589	0.183469	0.108349	0.541744	same	no
cg18285280	-0.896957	0.194241	3.87941e-06	0.0287226	-6.18388e-05	0.000360895	0.863996	0.989884	same	no	cg18285280_BC21	0.0203526	0.0701163	0.77161	0.955326	diff	no	-0.0001	0.0004	0.8651	+-	diff	no	0.957173
cg03985181	1.5714	0.340371	3.89846e-06	0.0287226
cg22992573	-2.18765	0.473949	3.91613e-06	0.0287226	5.5499e-06	0.000374068	0.988167	0.989884	diff	no
cg24577485	1.56075	0.338421	3.99062e-06	0.0289848							cg24577485_BC21	-0.0686798	0.116124	0.55423	0.907232	diff	no
cg12546556	-1.87842	0.408359	4.22666e-06	0.029804							cg12546556_TC21	0.0876764	0.125924	0.486263	0.865753	diff	no
cg20464072	0.954363	0.207508	4.24176e-06	0.029804	0.00035259	0.000269496	0.191166	0.771875	same	no
cg19323066	-1.56807	0.340975	4.24931e-06	0.029804							cg19323066_BC21	0.111225	0.104285	0.286177	0.786841	diff	no
cg02725398	-4.25092	0.924486	4.26277e-06	0.029804	-0.0053012	0.00214423	0.0136429	0.364947	same	sig	cg02725398_TC21	0.212524	0.261451	0.416296	0.845506	diff	no	-0.0053	0.0021	0.01368	+-	diff	no	0.28728
cg08536228	1.73411	0.377373	4.323e-06	0.0299453	-9.01836e-05	0.00052588	0.863884	0.989884	diff	no	cg08536228_TC11	0.130566	0.0724739	0.071615	0.410827	same	no	-0.0001	0.0005	0.8741	+-	diff	no	0.957173
cg22495165	-1.36752	0.297831	4.39886e-06	0.0300795							cg22495165_BC21	-0.0345644	0.0982209	0.72491	0.945276	same	no
cg02573238	2.14911	0.46817	4.42279e-06	0.0300795
cg00400263	2.28347	0.498008	4.5353e-06	0.0303855	-2.70312e-05	0.000328974	0.934535	0.989884	diff	no	cg00400263_BC21	-0.0949392	0.118871	0.424479	0.845506	diff	no	0	0.0003	0.9328	--	diff	no	0.963384
cg27102141	1.88632	0.411709	4.61273e-06	0.0303855	-0.000731599	0.00382042	0.848187	0.989884	diff	no
cg07457613	1.60016	0.349635	4.72498e-06	0.0303855
cg14320530	1.88784	0.412624	4.75714e-06	0.0303855	0.00184751	0.00290891	0.525541	0.989884	same	no
cg23409774	2.996	0.654952	4.77624e-06	0.0303855	-2.33735e-05	0.000161238	0.88478	0.989884	diff	no	cg23409774_TC11	0.012447	0.220921	0.95507	0.969267	same	no	0	0.0002	0.8848	+-	diff	no	0.957173
cg09889154	-1.1495	0.251362	4.80616e-06	0.0303855	-0.00174784	0.00163255	0.284683	0.807044	same	no
cg02031577	1.5183	0.332087	4.83079e-06	0.0303855							cg02031577_BC21	0.100593	0.120281	0.402976	0.845506	same	no
cg17583667	-2.31341	0.50603	4.83797e-06	0.0303855							cg17583667_TC11	-0.0629679	0.130303	0.628923	0.914049	same	no
cg27630512	-1.30743	0.28599	4.84057e-06	0.0303855
cg11342415	2.01119	0.440072	4.87394e-06	0.0303855	-9.00032e-06	5.27351e-05	0.864529	0.989884	diff	no	cg11342415_TC11	0.0137199	0.172499	0.936606	0.969267	same	no	0	0.0001	0.8645	+-	diff	no	0.957173
cg09803177	-1.62668	0.356106	4.92502e-06	0.0304501	-2.65835e-05	0.000206098	0.897405	0.989884	same	no	cg09803177_BC21	-0.0315121	0.0740613	0.670482	0.934668	same	no	0	0.0002	0.8964	--	diff	no	0.957173
cg00127198	-1.72336	0.377657	5.03565e-06	0.0308789	0.000170863	0.000123649	0.167434	0.746476	diff	no
cg08342194	1.40314	0.307898	5.1849e-06	0.031334	-0.000764371	0.00153005	0.617521	0.989884	diff	no	cg08342194_TC21	-0.294207	0.149377	0.0488883	0.353082	diff	no	-0.0008	0.0015	0.6033	--	diff	no	0.957173
cg04663750	1.39857	0.307029	5.2338e-06	0.031334
cg26554385	-0.88485	0.19432	5.27424e-06	0.031334							cg26554385_TC21	-0.0398212	0.0417419	0.340091	0.803852	same	no
cg02291032	2.21435	0.486302	5.2774e-06	0.031334
cg15266268	-1.74737	0.384054	5.36977e-06	0.0313885							cg15266268_BC21	0.228723	0.111507	0.0402481	0.307779	diff	no
cg00728147	-1.59588	0.35076	5.37049e-06	0.0313885
cg05033529	-1.23277	0.271056	5.41465e-06	0.0314013	0.00212915	0.00115934	0.0666752	0.482526	diff	no	cg05033529_TC21	-0.0963283	0.173523	0.578805	0.907232	same	no	0.0021	0.0012	0.06684	-+	diff	no	0.387983
cg20392347	-1.90899	0.420258	5.56088e-06	0.0320012							cg20392347_BC21	-0.0630445	0.121847	0.604871	0.913057	same	no
cg27224699	-1.16827	0.257308	5.61597e-06	0.0320609
cg02742119	-1.30513	0.28767	5.70832e-06	0.0320609
cg01119135	0.874805	0.192856	5.73146e-06	0.0320609	-5.39336e-05	0.000671718	0.936026	0.989884	diff	no
cg01881064	-1.66519	0.367139	5.74445e-06	0.0320609							cg01881064_TC21	-0.0537811	0.0740029	0.467384	0.846945	same	no
cg22702259	1.46074	0.322235	5.8113e-06	0.0320609							cg22702259_TC21	0.153634	0.143502	0.284349	0.786841	same	no
cg11606775	-1.12687	0.248618	5.82838e-06	0.0320609
cg18423962	1.64884	0.364537	6.09391e-06	0.0328731	-6.57079e-05	7.71063e-05	0.394392	0.959089	diff	no
cg05484618	-1.37421	0.3039	6.12789e-06	0.0328731							cg05484618_BC21	0.00680969	0.0768847	0.929424	0.969267	diff	no
cg27340283	-1.32922	0.294037	6.16692e-06	0.0328731	5.60007e-05	0.000126503	0.658122	0.989884	diff	no
cg02551218	-3.23543	0.715849	6.19232e-06	0.0328731							cg02551218_BC21	0.258529	0.339588	0.446477	0.845506	diff	no
cg24340970	0.886566	0.19616	6.19575e-06	0.0328731	0.000154215	0.000719973	0.830454	0.989884	same	no	cg24340970_TC21	0.0598198	0.0789732	0.448769	0.845506	same	no	0.0002	0.0007	0.825	++	same	no	0.957173
cg03793582	-1.46342	0.324472	6.47755e-06	0.0336844
cg14239640	-1.13973	0.252712	6.48359e-06	0.0336844							cg14239640_BC21	-0.104932	0.108574	0.333819	0.803638	same	no
cg16539346	-1.63271	0.362023	6.48373e-06	0.0336844	-0.000357092	0.0013682	0.794169	0.989884	same	no	cg16539346_TC11	0.102462	0.0816643	0.209599	0.778512	diff	no	-0.0003	0.0014	0.8104	+-	diff	no	0.957173
cg26062856	-1.02971	0.228394	6.52958e-06	0.0336887	0.000216263	0.000678074	0.749865	0.989884	diff	no	cg26062856_TC21	-0.0851458	0.0781531	0.275945	0.786841	same	no	0.0002	0.0007	0.757	-+	diff	no	0.957173
cg11539756	-1.44284	0.320161	6.58774e-06	0.0337559							cg11539756_TC21	-0.130119	0.0963973	0.177073	0.69756	same	no
cg26124727	-1.25624	0.279164	6.79504e-06	0.0343552							cg26124727_BC21	0.057465	0.073235	0.432649	0.845506	diff	no
cg11128216	1.56173	0.347053	6.79653e-06	0.0343552	0.000327182	0.000306825	0.286614	0.807044	same	no	cg11128216_TC21	-0.0441586	0.142242	0.756221	0.945276	diff	no	0.0003	0.0003	0.2866	-+	diff	no	0.722232
cg26341642	-1.50984	0.335711	6.87747e-06	0.034531							cg26341642_TC21	-0.110718	0.131119	0.39844	0.845506	same	no
cg09050670	1.26625	0.281882	7.05163e-06	0.0349765	-0.000902561	0.000799588	0.25935	0.807044	diff	no	cg09050670_TC11	0.168703	0.093995	0.0726848	0.410827	same	no	-0.0009	0.0008	0.2655	+-	diff	no	0.717938
cg04414629	2.70461	0.602241	7.09218e-06	0.0349765	0.000272508	0.000342066	0.425911	0.989884	same	no	cg04414629_BC21	-0.0277285	0.120662	0.818244	0.969267	diff	no	0.0003	0.0003	0.426	-+	diff	no	0.890591
cg18639342	4.17157	0.929174	7.13765e-06	0.0349765	2.23496e-05	9.56985e-05	0.815405	0.989884	same	no	cg18639342_BC11	0.0303277	0.185278	0.869978	0.969267	same	no	0	0.0001	0.8153	++	diff	no	0.957173
cg00328147	-1.48217	0.330172	7.15321e-06	0.0349765							cg00328147_TC21	-0.058321	0.0805559	0.469077	0.846945	same	no
cg07509708	-2.37499	0.529354	7.23736e-06	0.0351582
cg09567485	-1.39462	0.311084	7.35611e-06	0.0355045	-5.65986e-05	5.74239e-05	0.324638	0.868407	same	no
cg05628049	1.02554	0.228975	7.50436e-06	0.0359878	0.00022894	0.000811425	0.77791	0.989884	same	no	cg05628049_TC21	0.0809018	0.102622	0.430493	0.845506	same	no	0.0002	0.0008	0.7731	++	same	no	0.957173
cg24774357	2.27978	0.509271	7.58598e-06	0.036008	0.000839808	0.000940673	0.372267	0.948394	same	no	cg24774357_TC21	0.273953	0.112812	0.0151651	0.217826	same	sig	0.0009	0.0009	0.3612	++	same	no	0.8127
cg04852518	-1.02407	0.228903	7.68378e-06	0.036008							cg04852518_TC21	0.11086	0.111117	0.318433	0.786841	diff	no
cg22383924	-1.04663	0.23398	7.70733e-06	0.036008	-0.0018693	0.000880302	0.0340449	0.396775	same	sig	cg22383924_TC21	-0.124936	0.0553984	0.0241194	0.223965	same	sig	-0.0019	0.0009	0.03085	--	same	sig	0.31689
cg16550324	-1.13597	0.254023	7.75281e-06	0.036008	-2.97657e-06	7.48903e-05	0.968307	0.989884	same	no	cg16550324_BC21	0.125091	0.140052	0.371763	0.833262	diff	no	0	0.0001	0.9687	+-	diff	no	0.9687
cg11151544	-0.925937	0.207071	7.76364e-06	0.036008	0.000953969	0.00126038	0.449355	0.989884	diff	no	cg11151544_TC21	-0.0461387	0.0452564	0.307968	0.786841	same	no	0.0009	0.0013	0.4665	-+	diff	no	0.890591
cg27265118	2.20349	0.492877	7.79736e-06	0.036008	-0.000114204	0.000105621	0.27993	0.807044	diff	no
cg18439323	1.77226	0.396615	7.87801e-06	0.0361573	1.77729e-05	5.33636e-05	0.739189	0.989884	same	no	cg18439323_TC21	0.183266	0.0878135	0.0368886	0.29972	same	sig	0	0.0001	0.7381	++	diff	no	0.957173
cg05427189	1.77462	0.397482	8.02011e-06	0.036585							cg05427189_TC21	0.00527165	0.106049	0.960354	0.969267	same	no
cg09473060	1.10254	0.247174	8.1734e-06	0.036958							cg09473060_TC11	-0.272007	0.10963	0.0130964	0.217826	diff	no
cg10487127	1.36064	0.305086	8.20068e-06	0.036958	1.62861e-05	5.15252e-05	0.752034	0.989884	same	no	cg10487127_BC21	-0.0423792	0.0975123	0.66385	0.934668	diff	no	0	0.0001	0.7521	-+	diff	no	0.957173
cg02675634	-1.65393	0.371057	8.29793e-06	0.0371723							cg02675634_TC21	-0.0264478	0.0632494	0.675837	0.934668	same	no
cg05231308	-1.66906	0.37468	8.40423e-06	0.0372098	-0.00222593	0.00177363	0.20986	0.771875	same	no	cg05231308_TC21	-0.0311616	0.121431	0.797473	0.962916	same	no	-0.0022	0.0018	0.2082	--	same	no	0.6357
cg16021126	-1.14767	0.257653	8.41641e-06	0.0372098	-0.00325111	0.00115005	0.00482457	0.256251	same	sig
cg26224169	-1.69051	0.379608	8.4555e-06	0.0372098
cg02161940	-0.944049	0.212074	8.52649e-06	0.0373027							cg02161940_BC21	-0.0525744	0.0684763	0.442621	0.845506	same	no
cg15482003	-1.31474	0.295676	8.72596e-06	0.0376361							cg15482003_BC11	0.00945767	0.107002	0.929569	0.969267	diff	no
cg14876940	0.812818	0.182821	8.74913e-06	0.0376361							cg14876940_BC21	-0.00322574	0.0667896	0.961479	0.969267	diff	no
cg03393607	-1.27122	0.285992	8.79199e-06	0.0376361	-2.92404e-05	0.000295541	0.921214	0.989884	same	no	cg03393607_BC21	-0.128538	0.114243	0.260537	0.786841	same	no	0	0.0003	0.9189	--	diff	no	0.963384
cg24626003	-3.17095	0.713433	8.80393e-06	0.0376361	-2.35289e-05	6.66597e-05	0.724211	0.989884	same	no
cg19813207	-1.03522	0.233159	8.99745e-06	0.03806							cg19813207_TC21	0.155055	0.0863752	0.0726316	0.410827	diff	no
cg19590598	-1.61656	0.364107	9.00483e-06	0.03806	-0.00237567	0.0018896	0.209053	0.771875	same	no	cg19590598_TC21	0.0573096	0.111841	0.608358	0.913057	diff	no	-0.0024	0.0019	0.2119	+-	diff	no	0.6357
cg09930046	-0.82958	0.186914	9.06714e-06	0.0381081	-0.00159704	0.000771546	0.038798	0.396775	same	sig
cg13844237	1.76679	0.399085	9.55145e-06	0.0399193	0.000697246	0.00115271	0.545442	0.989884	same	no	cg13844237_TC21	0.0190702	0.0898908	0.831991	0.969267	same	no	0.0007	0.0012	0.5435	++	same	no	0.925419
cg24292594	-1.2108	0.273956	9.88362e-06	0.0410781							cg24292594_TC21	0.159499	0.0707165	0.0241037	0.223965	diff	no
cg12621411	-3.74557	0.848523	1.01374e-05	0.0418999
cg14879089	2.04932	0.464724	1.0349e-05	0.0425397							cg14879089_BC21	0.0205838	0.121123	0.865057	0.969267	same	no
cg13263950	-1.68083	0.381401	1.04809e-05	0.0427406
cg22624022	1.82511	0.414234	1.05308e-05	0.0427406	0.000400549	0.000957138	0.675711	0.989884	same	no
cg21099709	-1.14933	0.26097	1.06244e-05	0.0427406							cg21099709_BC21	0.00960731	0.0663396	0.884853	0.969267	diff	no
cg05366813	-1.07858	0.244908	1.06264e-05	0.0427406
cg13108341	4.37681	0.994759	1.08314e-05	0.043332							cg13108341_BC21	-0.397125	0.173396	0.0220053	0.223965	diff	no
cg14430115	1.44718	0.32933	1.11118e-05	0.0441613	-0.000123762	9.24459e-05	0.181063	0.771875	diff	no	cg14430115_BC21	0.0760962	0.130049	0.558457	0.907232	same	no	-0.0001	0.0001	0.1808	+-	diff	no	0.6328
cg22116708	1.22003	0.277693	1.11567e-05	0.0441613							cg22116708_BC21	0.185589	0.0649302	0.00425936	0.138429	same	sig
cg26683252	-1.28848	0.29371	1.14977e-05	0.0452378	0.000115287	0.000407822	0.777493	0.989884	diff	no	cg26683252_TC11	0.076254	0.134855	0.571767	0.907232	diff	no	0.0001	0.0004	0.7761	++	diff	no	0.957173
cg19631781	-1.21222	0.276428	1.15832e-05	0.0452378							cg19631781_TC21	-0.13259	0.0998199	0.18408	0.703836	same	no
cg07620167	-2.33849	0.533408	1.1649e-05	0.0452378	0.00061269	0.00224742	0.78522	0.989884	diff	no	cg07620167_TC21	-0.400108	0.139777	0.00420358	0.138429	same	sig	0.0005	0.0022	0.8208	-+	diff	no	0.957173
cg13860688	-1.6373	0.373502	1.16706e-05	0.0452378
cg25988219	-0.896433	0.204681	1.18861e-05	0.0457465							cg25988219_TC21	-0.159107	0.0624182	0.0108016	0.217826	same	sig
cg05281645	1.89733	0.433282	1.19241e-05	0.0457465	8.72312e-05	0.000277867	0.753661	0.989884	same	no
cg01879056	1.84438	0.42142	1.20561e-05	0.0460168
cg20871964	-2.5393	0.580711	1.22697e-05	0.0465944	-5.69092e-05	0.000704402	0.93563	0.989884	same	no
cg26452226	0.905285	0.207096	1.23487e-05	0.0466576
cg06682010	-1.31395	0.300758	1.24931e-05	0.0467056							cg06682010_BC21	-0.0267934	0.0741029	0.717673	0.945276	same	no
cg17598128	-1.57353	0.360248	1.2544e-05	0.0467056							cg17598128_TC21	0.192083	0.0803015	0.0167558	0.217826	diff	no
cg08808795	1.90915	0.437193	1.26057e-05	0.0467056							cg08808795_BC21	-0.116297	0.114959	0.311713	0.786841	diff	no
cg00051200	-1.75481	0.401858	1.26111e-05	0.0467056
cg01677601	1.18144	0.2707	1.27485e-05	0.0469819	0.000530654	0.000292904	0.0704434	0.482526	same	no	cg01677601_TC21	0.141231	0.114751	0.218414	0.786841	same	no	0.0005	0.0003	0.06955	++	same	no	0.387983
cg26708596	-1.67218	0.383544	1.30179e-05	0.0476978							cg26708596_TC21	0.114011	0.10938	0.297251	0.786841	diff	no
cg05701192	2.71209	0.622192	1.30703e-05	0.0476978
cg15036595	-1.47722	0.339007	1.31555e-05	0.0477717							cg15036595_BC21	0.0103004	0.135567	0.939435	0.969267	diff	no
cg14080585	-1.71234	0.393058	1.32183e-05	0.0477717	-0.00210166	0.00128935	0.103513	0.527421	same	no
cg19917412	-2.55381	0.586437	1.332e-05	0.0478056	0.000853156	0.00133503	0.522981	0.989884	diff	no	cg19917412_TC21	-0.241759	0.143415	0.0918482	0.497511	same	no	0.0008	0.0013	0.5331	-+	diff	no	0.925419
cg22575179	-1.37628	0.316111	1.33807e-05	0.0478056
cg26265835	-1.50032	0.344651	1.34194e-05	0.0478056							cg26265835_TC21	0.206914	0.0959145	0.0309841	0.268529	diff	no
cg05672337	-1.92364	0.442307	1.36698e-05	0.0484671
cg12528214	-1.16554	0.268366	1.4048e-05	0.0495047							cg12528214_BC21	-0.0772151	0.0635088	0.224055	0.786841	same	no
cg01700248	1.0914	0.251337	1.40948e-05	0.0495047							cg01700248_BC21	-0.00240702	0.0637981	0.969904	0.969904	diff	no
cg24335984	-0.880991	0.202935	1.41674e-05	0.0495272	0.000555717	0.000472113	0.239536	0.776676	diff	no	cg24335984_BC21	-0.10264	0.0671053	0.126133	0.607305	same	no	0.0006	0.0005	0.2435	-+	diff	no	0.697295
ch.11.102211250F	2.38501	0.549579	1.4267e-05	0.0496434	-0.000625888	0.000358398	0.0811726	0.482526	diff	no

## Sheet: Table S6
Table S6: Enrichment of urate change-associated CpG sites from females
input	p.value	q.value	pathway	source	members_input_overlap
beta > 0	0.00127311	0.0443849	TP53 Regulates Metabolic Genes	Reactome	PRKAG2; RHEB; YWHAQ
beta > 0	0.00137236	0.0443849	insulin	INOH	PRKAG2; RHEB; YWHAQ
beta > 0	0.00158518	0.0443849	insulin Mam	INOH	PRKAG2; RHEB; YWHAQ
beta > 0	0.00263908	0.0485069	Hematopoietic cell lineage - Homo sapiens (human)	KEGG	CD8A; GP5; CSF1
beta > 0	0.00301445	0.0485069	Energy dependent regulation of mTOR by LKB1-AMPK	Reactome	PRKAG2; RHEB
beta > 0	0.0041284	0.0485069	Translocation of SLC2A4 (GLUT4) to the plasma membrane	Reactome	PRKAG2; YWHAQ
beta > 0	0.00437082	0.0485069	Overview of leukocyte-intrinsic Hippo pathway functions	Wikipathways	YWHAQ; RASSF5
beta > 0	0.0046197	0.0485069	Target Of Rapamycin (TOR) Signaling	Wikipathways	PRKAG2; RHEB
beta > 0	0.00595975	0.0556243	MTOR signalling	Reactome	PRKAG2; RHEB
beta > 0	0.00674417	0.056651	Insulin signaling pathway - Homo sapiens (human)	KEGG	PRKAG2; SOCS1; RHEB
beta > 0	0.00809702	0.0613351	Notch-mediated HES/HEY network	PID	MAML2; MYOD1
beta > 0	0.00876216	0.0613351	Synaptic signaling pathways associated with autism spectrum disorder	Wikipathways	PRKAG2; RHEB
beta < 0	0.000345629	0.0165902	Vitamin D Metabolism	Wikipathways	GC; DHCR7
beta < 0	0.000772352	0.0185365	Peroxisomal protein import	Reactome	MPV17; DDO; PIPOX
beta < 0	0.00158518	0.0187724	Peroxisome - Homo sapiens (human)	KEGG	MPV17; DDO; PIPOX
beta < 0	0.00191181	0.0187724	Metabolism	Reactome	HMMR; PCYT1A; PIPOX; PGS1; ADRA2C; ALDH3B2; SPNS2; GC; ST3GAL4; MRI1; DDO; DHCR7; SETD4
beta < 0	0.00195546	0.0187724	Metabolism of lipids	Reactome	PCYT1A; ALDH3B2; DHCR7; SPNS2; GC; PGS1; SETD4
beta < 0	0.00281156	0.0202709	Phospholipid Biosynthesis	SMPDB	PCYT1A; PGS1
beta < 0	0.00295618	0.0202709	Transport of inorganic cations/anions and amino acids/oligopeptides	Reactome	SLC4A4; SLC24A3; SLC1A3
beta < 0	0.00389247	0.0233548	Prostaglandin formation from arachidonate	EHMN	SLCO4A1; SETD4
beta < 0	0.00475788	0.0253753	SLC-mediated transmembrane transport	Reactome	SLC4A4; SLCO4A1; SLC24A3; SLC1A3
beta < 0	0.00595975	0.0286068	Sphingolipid de novo biosynthesis	Reactome	ALDH3B2; SPNS2

## Sheet: Table S7
Table S7: Enrichment of urate change-associated CpG from males
input	p.value	q.value	pathway	source	members_input_overlap
beta > 0	0.00579175	0.139002	Cardiac Progenitor Differentiation	Wikipathways	SCN5A; ROR2
beta < 0	0.00012416	0.00427376	Sulindac Metabolic Pathway	Wikipathways	MSRA; MSRB2
beta < 0	0.000185816	0.00427376	Protein repair	Reactome	MSRB2; MSRA
beta < 0	0.001453	0.0196797	Acyl chain remodelling of PI	Reactome	PLA2G5; PLA2G2D
beta < 0	0.00184415	0.0196797	Acyl chain remodelling of PG	Reactome	PLA2G5; PLA2G2D
beta < 0	0.00251396	0.0196797	Methionine De Novo and Salvage Pathway	Wikipathways	MSRA; MSRB2
beta < 0	0.00275907	0.0196797	Acyl chain remodelling of PS	Reactome	PLA2G5; PLA2G2D
beta < 0	0.00355884	0.0196797	SARS-CoV-2 mitochondrial interactions	Wikipathways	TLR3; NDUFB9
beta < 0	0.00355884	0.0196797	alpha-Linolenic acid metabolism - Homo sapiens (human)	KEGG	PLA2G5; PLA2G2D
beta < 0	0.00414496	0.0196797	Acyl chain remodelling of PC	Reactome	PLA2G5; PLA2G2D
beta < 0	0.00477271	0.0196797	Acyl chain remodelling of PE	Reactome	PLA2G5; PLA2G2D
beta < 0	0.00477271	0.0196797	Linoleic acid metabolism - Homo sapiens (human)	KEGG	PLA2G5; PLA2G2D
beta < 0	0.00513382	0.0196797	Glycerophospholipid metabolism - Homo sapiens (human)	KEGG	PLA2G5; CHKA; PLA2G2D
beta < 0	0.00693122	0.0245258	Phospholipid metabolism	Reactome	PLA2G5; PLA2G2D; PLEKHA2; CHKA
beta < 0	0.00768827	0.0252615	Synthesis of PA	Reactome	PLA2G5; PLA2G2D
beta < 0	0.00837534	0.0256844	Spinal Cord Injury	Wikipathways	EPHA4; PLA2G5; XYLT1
beta < 0	0.00982737	0.0278258	RHOF GTPase cycle	Reactome	BAIAP2L1; AKAP12

## Sheet: Table S8
Table S8: X-chromosomal-wide association of urate or urate change
group	chr	probeID	BETA	SE	P_VAL	padj	pos	UCSC_RefGene_Name	Relation_to_Island	Gene (distance to TSS)
chrX_female	chrX	cg02007259	-0.0534374	0.0107838	7.2212e-07	0.0120767	48645037	GATA1;GATA1	OpenSea	GATA1 (+76)
chrX_female_short_term_change	chrX	cg06134719	0.0393251	0.008522	3.93959e-06	0.0280029	39698538		OpenSea	BCOR (+258,117)
chrX_female_short_term_change	chrX	cg01383599	-0.0366063	0.00809483	6.12055e-06	0.0280029	25020151		N_Shore	ARX (+13,913), POLA1 (+308,088)
chrX_female_short_term_change	chrX	cg22265142	-0.0541984	0.0120906	7.37118e-06	0.0280029	47479101	SYN1;SYN1	Island	SYN1 (+150)
chrX_female_short_term_change	chrX	cg08333400	-0.0224174	0.00503277	8.41687e-06	0.0280029	10126881	CLCN4	Island	CLCN4 (+1,858), MID1 (+461,792)
chrX_female_short_term_change	chrX	cg18780401	-0.0373944	0.00854421	1.20556e-05	0.0334241	48815125	OTUD5;OTUD5;OTUD5;OTUD5	Island	OTUD5 (-233)
chrX_female_short_term_change	chrX	cg26342575	0.0336143	0.00696426	1.38819e-06	0.0230925	48937688	WDR45;WDR45	Island	PRAF2 (-5,959), WDR45 (+20,370)
chrX_female_long_term_change	chrX	cg12461044	-0.049644	0.00903466	3.91062e-08	0.000654012	135276259	FHL1;FHL1;FHL1;FHL1;FHL1;FHL1;FHL1	OpenSea	FHL1 (+46,701), MAP7D3 (+57,478)
chrX_male_short_term_change	chrX	cg11590435	0.0737556	0.0131025	1.81132e-08	0.000302926	49766875	MIR532;MIR188;CLCN5;CLCN5;CLCN5	OpenSea	CLCN5 (+79,651), AKAP4 (+198,788)
chrX_male_long_term_change	chrX	cg20469935	-0.0404418	0.00862393	2.73892e-06	0.0229028	130964757	LOC286467	OpenSea	ENSG00000134602 (-192,535), OR13H1 (+286,808)
chrX_male_long_term_change	chrX	cg15075293	0.0708339	0.0134014	1.25314e-07	0.00209575	34959241		N_Shelf	TMEM47 (-283,837)
BCOR: Transcriptional corepressor
ARX: CNS development; POLA1: initiation of DNA replication.
SYN1:axonogenesis and synaptogenesis, learning
CLCN4: ion channel and neuronal disorders
MID1: Among its related pathways are Interferon gamma signaling and Cytokine Signaling in Immune system.
OTUD5: suppression of type I interferon (IFN) production
PRAF2: May be involved in ER/Golgi transport and vesicular traffic.
WDR45: cell cycle progression, signal transduction, apoptosis, and gene regulation.
FHL1: May have an involvement in muscle development or hypertrophy.
MAP7D3: Promotes the assembly and stability of microtubules
CLCN5: Activation of cAMP-Dependent PKA and Ion channel transport.
